# Supplementary material for: Tools for studying growth patterns and chemical dynamics of aggregated Pseudomonas aeruginosa exposed to different electron acceptors in an alginate bead model
Source: PubMed Central journal article supplement (PMC5818519; doi:10.1038/s41522-018-0047-4), 2018-02-19
Supplement: 41522_2018_47_MOESM1_ESM.pdf [file 41522_2018_47_MOESM1_ESM.pdf]

1 **Operating principles of OCT**

2

3 The measuring principle of OCT is based on low coherence interferometry <sup>1</sup>. OCT measures  
4 directly backscattered photons from different reflective layers in a sample, e.g. at refractive  
5 index mismatches in a tissue. Signal contrast in OCT thus depends on refractive index  
6 fluctuations, where highly scattering materials create good signal contrast. Organic material  
7 scatter light due to spatial differences in e.g, protein and lipid density, which lead to  
8 microscopic fluctuations in the refractive index of cells and thus signal contrast in OCT. The  
9 high sensitivity of OCT to biological material has facilitated the non-invasive observation of  
10 human tissues, but has also found application in environmental microbiology, via the  
11 monitoring of e.g., biofilm formation <sup>2</sup>.

12 While light scattering due to biological material creates signal contrast, it also  
13 reduces the vertical penetration depth of the OCT signal as light is lost due to  
14 scattering. Most OCT systems use light sources that employ near infrared radiation, which  
15 facilitates enhanced light penetration through biological tissues due to low light absorption.  
16 The vertical light attenuation of the OCT signal is thus primarily a function of 1) light  
17 scattering properties of the material, 2) the focus function of the objective and 3) the roll off  
18 response due to the spectral resolution of the spectrometer <sup>3</sup>. For our measurements, the  
19 latter two parameters were kept constant such that differences in light attenuation between  
20 the experimental treatments were only a function of the light scattering properties of the  
21 material.

22

23

24

25

26

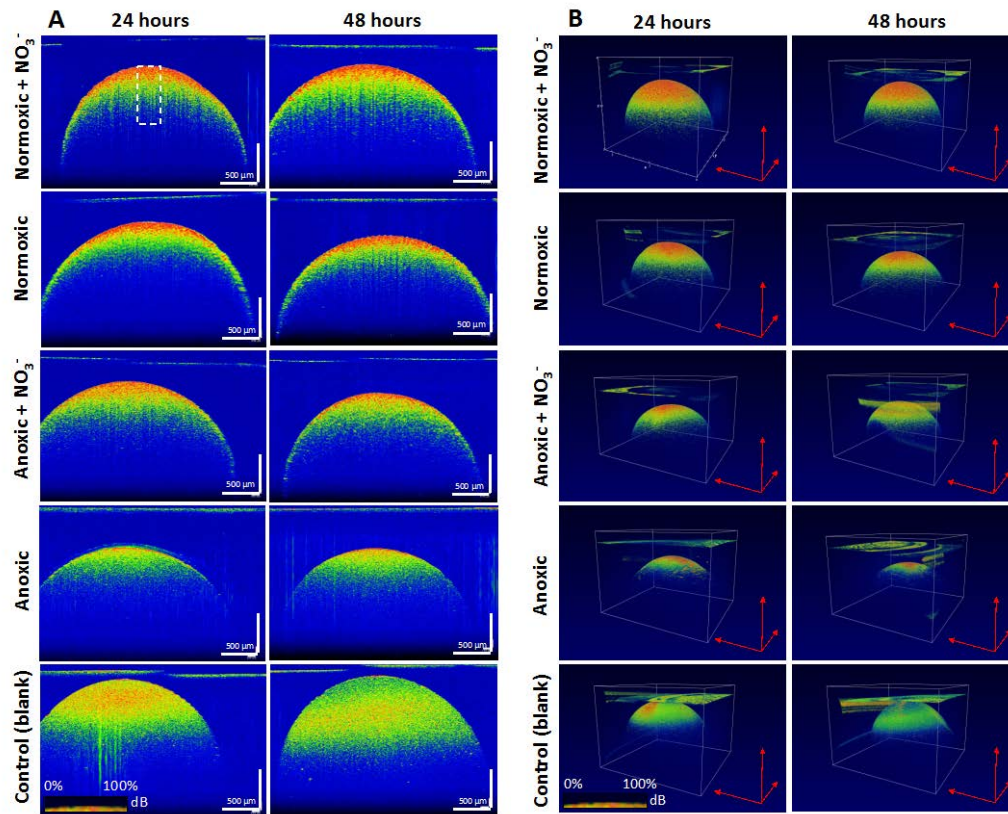

**Figure S1.** Optical coherence tomography A) Cross-sectional OCT B-scans visualising the growth dynamics of *P. aeruginosa* in alginate beads with different electron acceptors after 24 hours and 48 hours of incubation. The OCT B-scans were acquired in the centre of the alginate beads. The uncalibrated OCT dB signal is shown in false colour code and was normalised to the maximum OCT dB signal measured. The white rectangle shows an example of the image area that was used to calculate the average A-scan signal attenuation (Supplementary fig. S2) B) Three-dimensional rendering of the alginate beads shown in Panel A. OCT scans are shown in x,y,z dimensions. Red arrows are 1 mm in length in each dimension. Note that the planar surface above the alginate bead is an optical artefact related to the inference signal from the air-water interface.

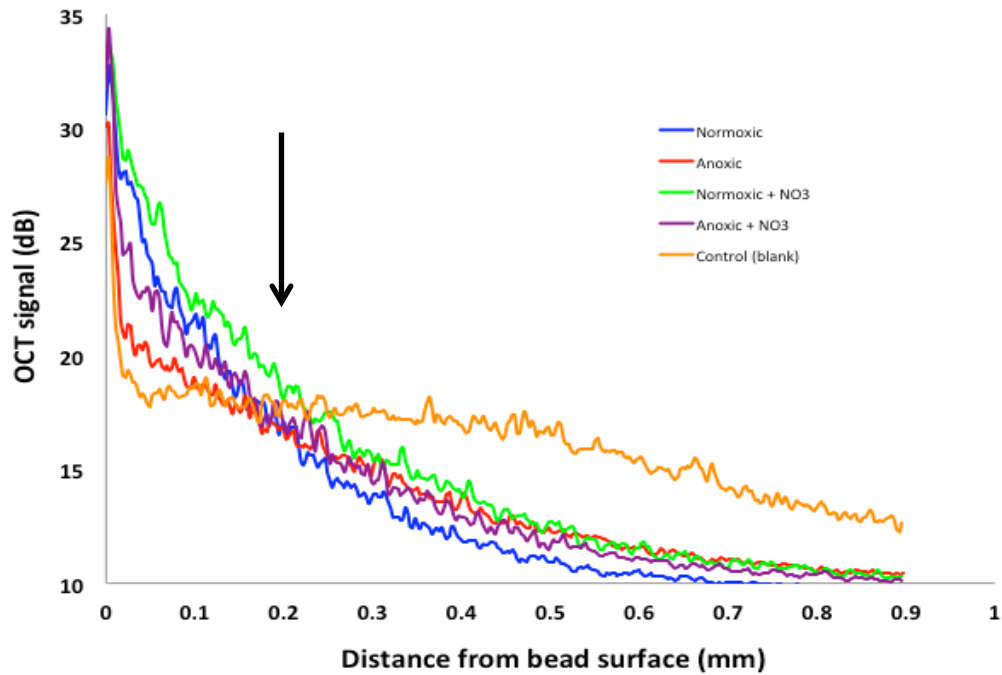

Figure S2. Vertical attenuation of the OCT signal for the different treatments. Data was averaged for a lateral width of 100  $\mu\text{m}$ . The arrow indicates were the OCT signal approaches that of the OCT signal of pure alginate (control).

29

30

31

32

33

34

### 35 References

36

- 37 1 Fujimoto, J. G., Pitris, C., Boppart, S. A. & Brezinski, M. E. Optical coherence  
 38 tomography: an emerging technology for biomedical imaging and optical biopsy.  
 39 *Neoplasia* **2**, 9-25 (2000).
- 40 2 Xi, C. W., Marks, D., Schlachter, S., Luo, W. & Boppart, S. A. High-resolution three-  
 41 dimensional imaging of biofilm development using optical coherence tomography. *J*  
 42 *Biomed Opt* **11**, doi:10.1117/1.2209962 (2006).
- 43 3 Levitz, D. *et al.* Quantitative characterization of developing collagen gels using  
 44 optical coherence tomography. *J Biomed Opt* **15**, 026019, doi:10.1117/1.3377961  
 45 (2010).

46
